# Supplementary material for: Antimicrobial Spectrum of Titroleane™: A New Potent Anti-Infective Agent
Source: MDPI journal article supplement (doi:10.3390/antibiotics9070391), 2020-07-08
Supplement: s1 [file s1]

## Supplementary materials

Figure S1

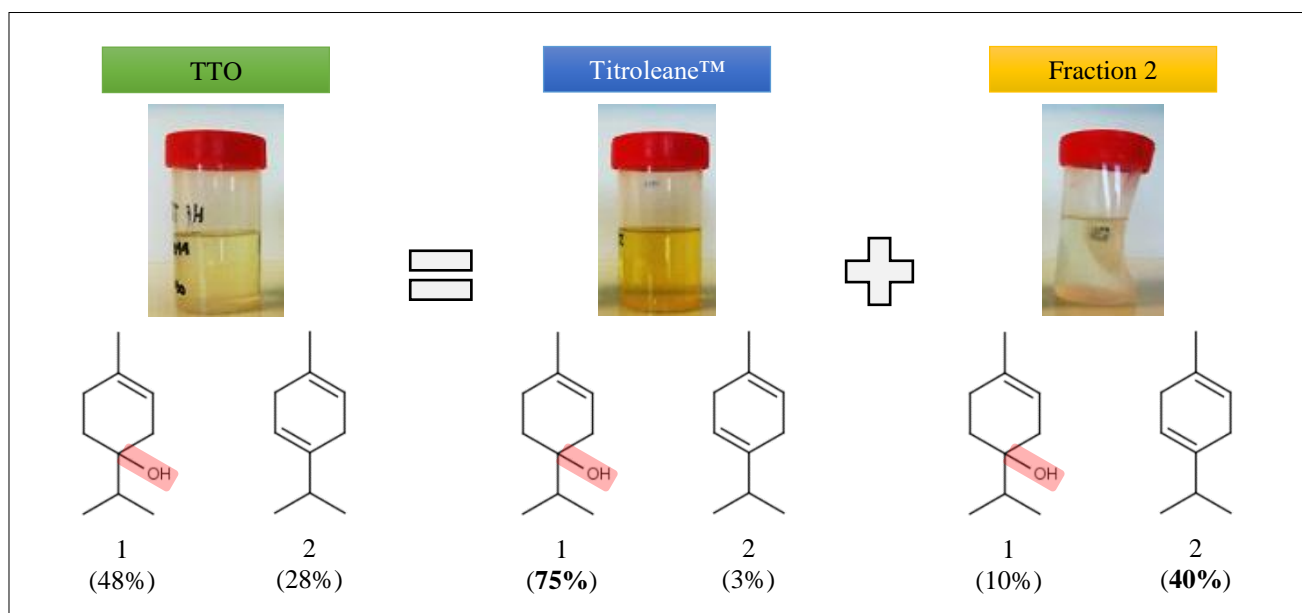

**Figure S1.** Extracts after two-month storage. Presentation of plastic containers with TTO, Titroleane™ or Fraction 2 after two-month storage. The two main molecules of TTO are also represented with their concentrations in percent in each extract. 1: terpinen-4-ol, 2: γ-terpinene.
